# Supplementary material for: In vitro Interactions of Chicken Programmed Cell Death 1 (PD-1) and PD-1 Ligand-1 (PD-L1)
Source: PubMed Central journal article supplement (PMC6930881; doi:10.3389/fcimb.2019.00436), 2019-12-19

**Supplementary Table 1. List of primers used for construction of recombinant chPD-1 and chPD-L1 plasmids for full length cDNA and extracellular coding region 3 amplification.**

| <b>Full length cDNA amplification</b>     | <b>Sequence (5' - 3')</b>     |
|-------------------------------------------|-------------------------------|
| chPD-1 -Forward                           | ATTGCTAGCGCTCTGGGCACCTCG      |
| chPD-1 -Reverse                           | ATTGCGGCCGCTAAATGGCCCTCAG     |
| chPD-L1 -Forward                          | ATTGCTAGCGTTCTACCTACATGATG    |
| chPD-L1 -Reverse                          | ATTGCGGCCGCCCTGCTTTCTCTAAG    |
| <b>Extracellular coding amplification</b> | <b>Sequence (5' - 3')</b>     |
| chPD-1 -Forward                           | ATTGCTAGCGCTCTGGGCACCTCG      |
| chPD-1 -Reverse                           | TCGAGATCTGGGGGGCTGCTTTCC      |
| chPD-L1 -Forward                          | ATTGCTAGCGTTCTACCTACATGATG    |
| chPD-L1 -Reverse                          | TTAAGATCTTCAGTCCAGAGTACGTCATC |

**Supplementary Table 2. The amino acid sequence identities of PD-1 and PD-L1 among animal species.**

| <b>Species</b> | <b>Chicken</b> | <b>Human</b> | <b>Monkey</b> | <b>Mouse</b> | <b>Dog</b> | <b>Cattle</b> | <b>Rat</b> |
|----------------|----------------|--------------|---------------|--------------|------------|---------------|------------|
| <b>Chicken</b> | -              | 38.62        | 38.62         | 38.62        | 37.71      | 36.33         | 39.65      |
| <b>Human</b>   | 30.76          | -            | 92.06         | 69.65        | 76.12      | 73.35         | 70         |
| <b>Monkey</b>  | 30.76          | 96.18        | -             | 68.62        | 74.39      | 72.66         | 68.62      |
| <b>Mouse</b>   | 27.83          | 59.72        | 60.41         | -            | 67.12      | 65.74         | 84.48      |
| <b>Dog</b>     | 27.47          | 66.31        | 65.62         | 55.55        | -          | 78.89         | 68.51      |
| <b>Cattle</b>  | 29.3           | 65.6         | 66.31         | 51.77        | 70.92      | -             | 66.78      |
| <b>Rat</b>     | 27.1           | 61.32        | 63.76         | 86.75        | 57.49      | 56.73         | -          |

Lower section shows amino acid identity percentage homologies of PD-1, and higher section shows PD-L1.

**Supplementary Table 3. The amino acid sequence similarities of PD-1 and PD-L1 among animal species.**

| <b>Species</b> | <b>Chicken</b> | <b>Human</b> | <b>Monkey</b> | <b>Mouse</b> | <b>Dog</b> | <b>Cattle</b> | <b>Rat</b> |
|----------------|----------------|--------------|---------------|--------------|------------|---------------|------------|
| <b>Chicken</b> | -              | 50.68        | 50            | 48.96        | 48.44      | 47.05         | 50.34      |
| <b>Human</b>   | 39.56          | -            | 92.41         | 76.55        | 77.5       | 77.85         | 75.51      |
| <b>Monkey</b>  | 39.56          | 96.87        | -             | 75.51        | 76.47      | 76.81         | 73.44      |
| <b>Mouse</b>   | 36.99          | 64.58        | 64.93         | -            | 73.7       | 73.7          | 86.55      |
| <b>Dog</b>     | 36.63          | 69.79        | 69.44         | 60.06        | -          | 81.66         | 74.04      |
| <b>Cattle</b>  | 36.63          | 68.79        | 69.14         | 56.02        | 73.04      | -             | 73.35      |
| <b>Rat</b>     | 35.89          | 66.2         | 68.29         | 87.45        | 62.71      | 61.7          | -          |

Lower section shows amino acid similarity percentage homologies of PD-1, and higher section shows PD-L1.

**Supplementary Table 4. List of monoclonal antibodies specific against chPD-1 and chPD-L1.**

| <b>Monoclonal antibodies name</b> | <b>Specificity against</b> | <b>Subclass</b> | <b>Isotype</b> |
|-----------------------------------|----------------------------|-----------------|----------------|
| 2C10                              | ChPD-1                     | IgG1            | Kappa          |
| 5E2                               | ChPD-1                     | IgG3            | Kappa          |
| 2A6                               | ChPD-L1                    | IgG             | Kappa          |
| 3A2                               | ChPD-L1                    | IgG             | Kappa          |
| 4E4                               | ChPD-L1                    | IgG             | Kappa          |
| 4G7                               | ChPD-L1                    | IgG             | Kappa          |
| 6E5                               | ChPD-L1                    | IgG             | Kappa          |

**Supplementary Figure 1.** Monoclonal antibodies clones, namely, 2C10 and 5E2 specific against chPD-1 and 2A6, 3A2, 4E4, 4G7 and 6E5 specific against chPD-L1. Scale bar represents 60  $\mu\text{m}$  for chPD-1 and 40  $\mu\text{m}$  for chPD-L1.

**PD-1**

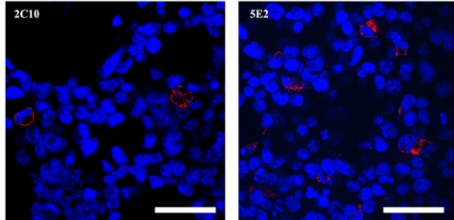

**PD-L1**

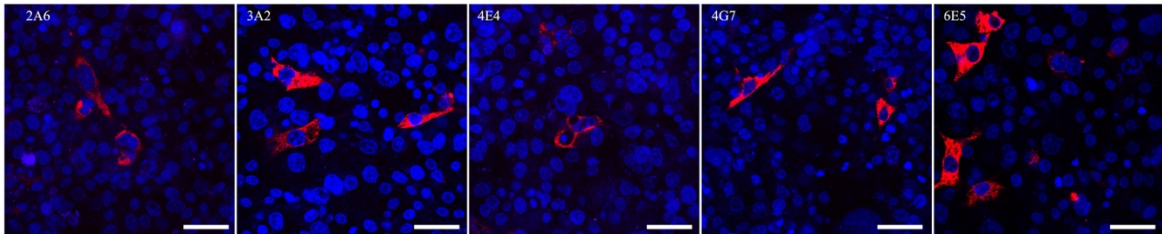

Supplement: Data_Sheet_1.pdf [file Data_Sheet_1.pdf]
